# Supplementary material for: Are green solvents truly green? Integrating life cycle assessment and techno-economic analysis for sustainable membrane fabrication
Source: Royal Society of Chemistry journal article supplement (doi:10.1039/d3gc00776f), 2023-01-01
Supplement: d3gc00776f1.pdf [file d3gc00776f1.pdf]

## Electronic Supplementary Information

### **Are green solvents truly green? Integrating life cycle assessment and techno-economic analysis for sustainable membrane fabrication**

Seang Uyin Hong<sup>a,1</sup>, Yida Wang<sup>a,1</sup>, Leong Sing Soh<sup>a</sup>, Wai Fen Yong<sup>a,b,\*</sup>

<sup>a</sup>School of Energy and Chemical Engineering, Xiamen University Malaysia, Selangor Darul Ehsan 43900, Malaysia

<sup>b</sup>College of Chemistry and Chemical Engineering, Xiamen University, Xiamen 361005, Fujian, China

#### **\*Corresponding author:**

Dr. Wai Fen Yong

*E-mail address:* waifen.yong@xmu.edu.my (W.F. Yong)

<sup>1</sup>Co-first author. The contributions from these authors to this work were equal.

**Table S1.** The costs of raw materials and energy sources required to fabricate polyimide membranes. The quotations of chemicals, nitrogen, and electricity were obtained from Sigma Aldrich, Alpha Gas, and the average global electricity price, respectively.

| Component         | Quantity | Cost (USD) | Cost per unit (USD/unit) |
|-------------------|----------|------------|--------------------------|
| 6FDA              | 25 g     | 322.00     | 12.88/g                  |
| Durene            | 100 g    | 65.20      | 0.65/g                   |
| NMP               | 1 L      | 212.00     | 0.21/g                   |
| DMSO              | 1 L      | 336.00     | 0.31/g                   |
| EA                | 1 L      | 108.00     | 0.12/g                   |
| GBL               | 500 g    | 64.10      | 0.13/g                   |
| TEAm              | 100 mL   | 35.00      | 0.33/g                   |
| Ac <sub>2</sub> O | 25 g     | 38.30      | 1.53/g                   |
| Toluene           | 1 L      | 79.40      | 0.09/g                   |
| N <sub>2</sub>    | 50 L     | 58.60      | 1.17/L                   |
| Methanol          | 200 L    | 2,260.00   | 11.30/L                  |
| Electricity       | 1 kWh    | 0.17       | 0.17/kWh                 |

**Table S2.** The environmental impact scores for various membrane production routes at the midpoint level.

| Route                                    |                        | R1        | R2        | R3        | R4        | R5        |
|------------------------------------------|------------------------|-----------|-----------|-----------|-----------|-----------|
| Impact category                          | Unit                   | Value     |           |           |           |           |
| Fine particulate matter formation (FPMF) | kg PM2.5-Eq            | 0.39      | 0.36      | 0.36      | 0.38      | 0.36      |
| Fossil resource scarcity (FRS)           | kg oil-Eq              | 80.92     | 73.89     | 74.75     | 76.43     | 74.41     |
| Freshwater ecotoxicity (FET)             | kg 1,4-DCB-Eq          | 7.61      | 7.09      | 7.16      | 7.41      | 7.19      |
| Freshwater eutrophication (FEP)          | kg P-Eq                | 0.09      | 0.08      | 0.08      | 0.08      | 0.08      |
| Global warming potential (GWP)           | kg CO <sub>2</sub> -Eq | 182.84    | 162.93    | 166.47    | 175.38    | 164.69    |
| Human carcinogenic toxicity (HCT)        | kg 1,4-DCB-Eq          | 503.05    | 458.84    | 466.14    | 489.74    | 464.85    |
| Human non-carcinogenic toxicity (HNCT)   | kg 1,4-DCB-Eq          | 37,439.89 | 32,908.49 | 33,488.27 | 35,534.94 | 33,229.27 |
| Ionizing radiation (IR)                  | kBq Co-60-Eq           | 22.76     | 20.46     | 20.75     | 22.41     | 20.83     |
| Land use (LU)                            | m <sup>2</sup> crop-Eq | 2.46      | 2.00      | 2.12      | 2.38      | 2.03      |
| Marine ecotoxicity (MET)                 | kg 1,4-DCB-Eq          | 47,000.53 | 41,468.82 | 42,175.86 | 44,676.35 | 41,886.38 |
| Marine eutrophication (MEP)              | kg N-Eq                | 0.07      | 0.07      | 0.07      | 0.07      | 0.07      |
| Mineral resource scarcity (MRS)          | kg Cu-Eq               | 0.28      | 0.23      | 0.24      | 0.26      | 0.24      |
| Ozone depletion (OD)                     | kg CFC11-Eq            | 0.0001    | 0.0001    | 0.0001    | 0.0001    | 0.0001    |
| Ozone formation, human health (OFH)      | kg NO <sub>x</sub> -Eq | 0.40      | 0.36      | 0.37      | 0.39      | 0.37      |
| Ozone formation, ecosystems (OFE)        | kg NO <sub>x</sub> -Eq | 0.42      | 0.37      | 0.38      | 0.40      | 0.38      |
| Terrestrial acidification (TA)           | kg SO <sub>2</sub> -Eq | 0.68      | 0.59      | 0.61      | 0.65      | 0.60      |
| Terrestrial ecotoxicity (TET)            | kg 1,4-DCB-Eq          | 333.99    | 261.23    | 270.68    | 296.09    | 263.14    |
| Water consumption (WCP)                  | m <sup>3</sup>         | 2.31      | 1.41      | 1.47      | 2.24      | 1.42      |

**Table S3.** The environmental burden arising from the endpoint indicators of different membrane fabrication routes.

| Route           |        | R1    | R2    | R3    | R4    | R5    |
|-----------------|--------|-------|-------|-------|-------|-------|
| Damage category | Unit   | Value |       |       |       |       |
| Human health    | points | 57.10 | 50.59 | 51.51 | 54.50 | 51.12 |
| Ecosystems      | points | 4.66  | 4.13  | 4.21  | 4.45  | 4.17  |
| Resources       | points | 0.17  | 0.16  | 0.16  | 0.16  | 0.16  |
| Total           | points | 61.93 | 54.87 | 55.87 | 59.11 | 55.44 |

**Table S4.** Comparison results of cumulative energy demand from various membrane preparation processes.

| Route                   |      | R1      | R2      | R3      | R4      | R5      |
|-------------------------|------|---------|---------|---------|---------|---------|
| Energy demand           | Unit | Value   |         |         |         |         |
| Non-renewable biomass   | MJ   | 0.05    | 0.04    | 0.04    | 0.05    | 0.04    |
| Fossil                  | MJ   | 3703.80 | 3381.82 | 3421.51 | 3498.61 | 3405.85 |
| Nuclear                 | MJ   | 279.40  | 252.35  | 255.37  | 278.05  | 257.01  |
| Biomass                 | MJ   | 34.35   | 26.69   | 28.99   | 33.94   | 26.98   |
| Water                   | MJ   | 127.57  | 118.12  | 118.98  | 125.69  | 120.05  |
| Wind, solar, geothermal | MJ   | 30.26   | 27.90   | 28.03   | 30.07   | 28.45   |

**Table S5.** Comparison data of ecological footprint involved in different membrane production routes.

| Route           |                | R1     | R2     | R3     | R4     | R5     |
|-----------------|----------------|--------|--------|--------|--------|--------|
| Footprint       | Unit           | Value  |        |        |        |        |
| Carbon dioxide  | m <sup>2</sup> | 475.15 | 423.03 | 432.29 | 455.71 | 423.03 |
| Nuclear         | m <sup>2</sup> | 54.75  | 49.45  | 50.04  | 54.48  | 49.45  |
| Land occupation | m <sup>2</sup> | 10.23  | 8.33   | 8.83   | 9.96   | 8.33   |
| Total           | m <sup>2</sup> | 540.13 | 480.81 | 491.15 | 520.16 | 480.81 |

**Table S6.** The production costs incurred from different membrane fabrication routes.

| Route           |      | R1      | R2      | R3      | R4      | R5      |
|-----------------|------|---------|---------|---------|---------|---------|
| Component       | Unit | Value   |         |         |         |         |
| Monomers        | USD  | 1170.35 | 1170.35 | 1170.35 | 1170.35 | 1170.35 |
| Solvents        | USD  | 658.81  | 972.53  | 376.46  | 407.84  | 972.53  |
| Methanol        | USD  | 414.71  | 414.71  | 414.71  | 414.71  | 414.71  |
| Other materials | USD  | 91.82   | 91.82   | 91.82   | 91.82   | 15.80   |
| Electricity     | USD  | 18.80   | 18.80   | 18.80   | 18.80   | 19.24   |
| Total           | USD  | 2354.49 | 2668.21 | 2072.14 | 2103.51 | 2592.62 |

**Table S7.** The weighting factors and environmental costs for various membrane production routes at the midpoint level.

| Route           |                        |                             | R1                       | R2      | R3      | R4      | R5      |
|-----------------|------------------------|-----------------------------|--------------------------|---------|---------|---------|---------|
| Impact category | Unit                   | Weighting factor (USD/unit) | Environmental cost (USD) |         |         |         |         |
| FPMF            | kg PM2.5-Eq            | 0.0325 <sup>a</sup>         | 0.01                     | 0.01    | 0.01    | 0.01    | 0.01    |
| FRS             | kg oil-Eq              | 0.0012 <sup>a</sup>         | 0.10                     | 0.09    | 0.09    | 0.09    | 0.09    |
| FET             | kg 1,4-DCB-Eq          | 0.0333 <sup>b</sup>         | 0.25                     | 0.24    | 0.24    | 0.25    | 0.24    |
| FEP             | kg P-Eq                | 0.1080 <sup>a</sup>         | 0.01                     | 0.01    | 0.01    | 0.01    | 0.01    |
| GWP             | kg CO <sub>2</sub> -Eq | 0.0077 <sup>a</sup>         | 1.40                     | 1.25    | 1.28    | 1.35    | 1.26    |
| HCT             | kg 1,4-DCB-Eq          | 0.0999 <sup>b</sup>         | 50.25                    | 45.84   | 46.57   | 48.92   | 46.44   |
| HNCT            | kg 1,4-DCB-Eq          | 0.0999 <sup>b</sup>         | 3740.24                  | 3287.56 | 3345.48 | 3549.94 | 3319.60 |
| IR              | kBq Co-60-Eq           | 3.3000 <sup>b</sup>         | 75.10                    | 67.51   | 68.47   | 73.95   | 68.75   |
| LU              | m <sup>2</sup> crop-Eq | 3.0500 <sup>b</sup>         | 7.49                     | 6.11    | 6.46    | 7.27    | 6.18    |
| MET             | kg 1,4-DCB-Eq          | 0.0001 <sup>b</sup>         | 5.22                     | 4.60    | 4.68    | 4.96    | 4.65    |
| MEP             | kg N-Eq                | 0.1080 <sup>a</sup>         | 0.01                     | 0.01    | 0.01    | 0.01    | 0.01    |
| MRS             | kg Cu-Eq               | 0.0025 <sup>a</sup>         | 0.0007                   | 0.0006  | 0.0006  | 0.0006  | 0.0006  |
| OD              | kg CFC11-Eq            | 1.9800 <sup>a</sup>         | 0.80                     | 0.71    | 0.73    | 0.77    | 0.72    |
| OFH             | kg NO <sub>x</sub> -Eq | 1.9800 <sup>a</sup>         | 0.82                     | 0.73    | 0.76    | 0.79    | 0.74    |
| OFE             | kg NO <sub>x</sub> -Eq | 1.9800 <sup>a</sup>         | 0.0002                   | 0.0002  | 0.0002  | 0.0002  | 0.0002  |
| TA              | kg SO <sub>2</sub> -Eq | 0.0931 <sup>a</sup>         | 0.06                     | 0.06    | 0.06    | 0.06    | 0.06    |
| TET             | kg 1,4-DCB-Eq          | 0.0666 <sup>b</sup>         | 22.24                    | 17.40   | 18.03   | 19.72   | 17.53   |
| WCP             | m <sup>3</sup>         | 0.2130 <sup>a</sup>         | 0.49                     | 0.30    | 0.31    | 0.48    | 0.30    |
| Total           | -                      | -                           | 3904.51                  | 3432.43 | 3493.18 | 3708.58 | 3466.59 |

<sup>a</sup> Obtained from Cao et al., 2015, <sup>b</sup> Estimated from Ecochain and US National Academy of Sciences.

**Table S8.** The deviations of endpoint impact scores obtained from the parameter sensitivity analysis.

| Route       |      | R1    | R2   | R3   | R4   | R5   |
|-------------|------|-------|------|------|------|------|
| Component   | Unit | Value |      |      |      |      |
| Monomers    | %    | 8.9   | 10.0 | 9.8  | 9.3  | 9.9  |
| Solvents    | %    | 4.4   | 1.1  | 1.6  | 3.2  | 1.1  |
| Methanol    | %    | 3.0   | 3.3  | 3.3  | 3.1  | 3.3  |
| Electricity | %    | 13.7  | 15.5 | 15.2 | 14.4 | 15.7 |

**Table S9.** The production cost variation resulting from the parameter sensitivity analysis.

| Route       |      | R1    | R2   | R3   | R4   | R5   |
|-------------|------|-------|------|------|------|------|
| Component   | Unit | Value |      |      |      |      |
| Monomers    | %    | 14.9  | 13.2 | 16.9 | 16.7 | 13.5 |
| Solvents    | %    | 8.4   | 10.9 | 5.5  | 5.8  | 11.3 |
| Methanol    | %    | 5.3   | 4.7  | 6.0  | 5.9  | 4.8  |
| Electricity | %    | 0.2   | 0.2  | 0.3  | 0.3  | 0.2  |
